# Supplementary material for: Anti‐Biofilm Effect of Ampicillin‐Loaded Poly (Lactic‐co‐glycolic Acid) Nanoparticles Conjugated with Lysostaphin on Methicillin‐Resistant Staphylococcus aureus
Source: Hindawi journal article supplement (doi:10.1155/2023/4627848), 2023-01-01
Supplement: f1 [file 4627848.f1.docx]

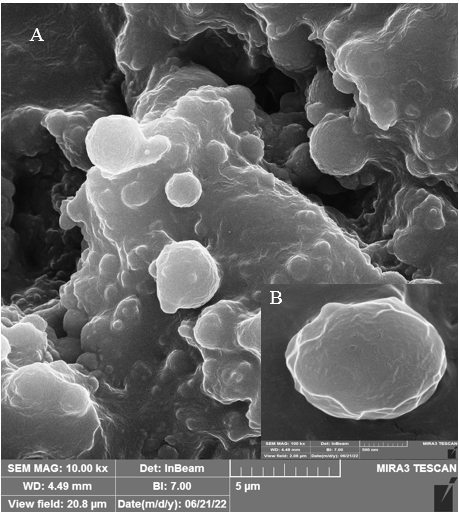


**Figure 1. Scanning electron microscopy of PLGA-AMP nanoparticles using field emission technology**
